# Supplementary material for: A novel crownophane trapping CO2 as carbonic acid at room temperatureElectronic supplementary information (ESI) available: synthesis of compounds, 2 ? 4, and the data of their 1H NMR, IR, ESI mass spectra and elemental analysis, and the charts of IR spectrum and DTA and TGA thermograms of the solids separated out after bubbling CO2. See http://www.rsc.org/suppdata/cc/b4/b403152k/
Source: Royal Society of Chemistry journal article supplement (doi:10.1039/b403152k), 2004-01-01

*Electronic Supplemental Information*

Title: A novel crownophane trapping CO<sub>2</sub> as carbonic acid at room temperature

Author: Kazuhisa Hiratani\*, Nobuko Sakamoto, Naohiro Kameta, Michinori Karikomi and  
Yoshinobu Nagawa

Content

<sup>1</sup>H NMR, IR, ESI-MS and elemental analysis data for compounds, **2** ~ **4**.

IR charts of the solid of compound **4** before (a) and after (b) bubbling carbon dioxide in aqueous MeCN.

DTA and TGA thermograms of the complex of **4** with carbonic acid

2-bis(2-chloromethylcarbonylethoxy)ethane (**2**): The reaction of bis(2-aminoethoxy)ethane with chloroacetyl chloride gave **2** in 55% yield. mp. 85~88°C; <sup>1</sup>H NMR (300 MHz, CDCl<sub>3</sub>, ppm) 3.53 (m, 4H, O-CH<sub>2</sub>CH<sub>2</sub>-N), 3.61 (m, O-CH<sub>2</sub>-CH<sub>2</sub>-N), 3.65 (s, 4H, C(=O)-CH<sub>2</sub>), 4.07 (s, O-CH<sub>2</sub>-CH<sub>2</sub>-O), 7.00 (broad, 2H, C-NH); IR (KBr, cm<sup>-1</sup>) 3310 (amide-NH), 1643 (amide-C=O); ESI mass, calcd for C<sub>10</sub>H<sub>18</sub>Cl<sub>2</sub>N<sub>2</sub>O<sub>4</sub> 300.06, found 323.1 (+ Na<sup>+</sup>).

Compound **3**: mp. 205~206°C; <sup>1</sup>H NMR (300 MHz, CDCl<sub>3</sub>, ppm) 3.51 (m, 12H, O-CH<sub>2</sub>CH<sub>2</sub>-OCH<sub>2</sub>-CH<sub>2</sub>-N), 4.67 (s, 4H, OCH<sub>2</sub>C=CH<sub>2</sub>), 4.90 (s, 4H, C(=O)-CH<sub>2</sub>), 5.61 (s, 2H, H<sub>2</sub>C=C), 7.17 (s, 2H, Ar-H), 7.22 (s, 2H, Ar-H), 7.38 (m, 4H, Ar-H), 7.45 (broad, 2H, C-NH), 7.65 (m, 2H, Ar-H), 7.69 (m, 2H, Ar-H); IR (KBr, cm<sup>-1</sup>) 3435 (amide-NH), 1676 (amide-C=O); ESI mass, calcd for C<sub>34</sub>H<sub>36</sub>N<sub>2</sub>O<sub>8</sub> 600.25, found 623.3 (+ Na<sup>+</sup>); Elemental analysis: calcd for C<sub>34</sub>H<sub>36</sub>N<sub>2</sub>O<sub>8</sub> + 2H<sub>2</sub>O C: 64.14, H: 6.33, N: 4.40, Found C: 64.02, H: 6.24, N: 4.27.

Compound **4**: mp. 212~212.5°C; <sup>1</sup>H NMR (300 MHz, CDCl<sub>3</sub>, ppm) 3.29 (s, 4H, O-CH<sub>2</sub>CH<sub>2</sub>-O), 3.50 (m, 8H, O-CH<sub>2</sub>-CH<sub>2</sub>-N), 3.94 (s, 4H, ArCH<sub>2</sub>C=CH<sub>2</sub>), 4.72 (s, 2H, H<sub>2</sub>C=C), 4.75 (s, 4H, C(=O)-CH<sub>2</sub>), 6.78 (s, 2H, OH), 7.33 (broad, 2H, C-NH), 7.10 (s, 2H, Ar-H), 7.35 (t, J=3.9Hz, 4H, Ar-H), 7.69 (d, J=8.7Hz, 2H, Ar-H), 7.85 (d, J=8.7Hz, 2H, Ar-H); IR (KBr, cm<sup>-1</sup>) 3334 (amide-NH, OH), 1656 (amide-C=O); ESI mass, calcd for C<sub>34</sub>H<sub>36</sub>N<sub>2</sub>O<sub>8</sub> 600.25, found 623.3(+ Na<sup>+</sup>); Elemental analysis: calcd for C<sub>34</sub>H<sub>36</sub>N<sub>2</sub>O<sub>8</sub> + 1/2H<sub>2</sub>O C: 66.98, H: 6.12, N: 4.59, Found C: 66.97, H: 5.97, N: 4.53.

## IR charts

IR spectra of the solid of compound **4** before (a) and after (b) bubbling carbon dioxide in aqueous MeCN.

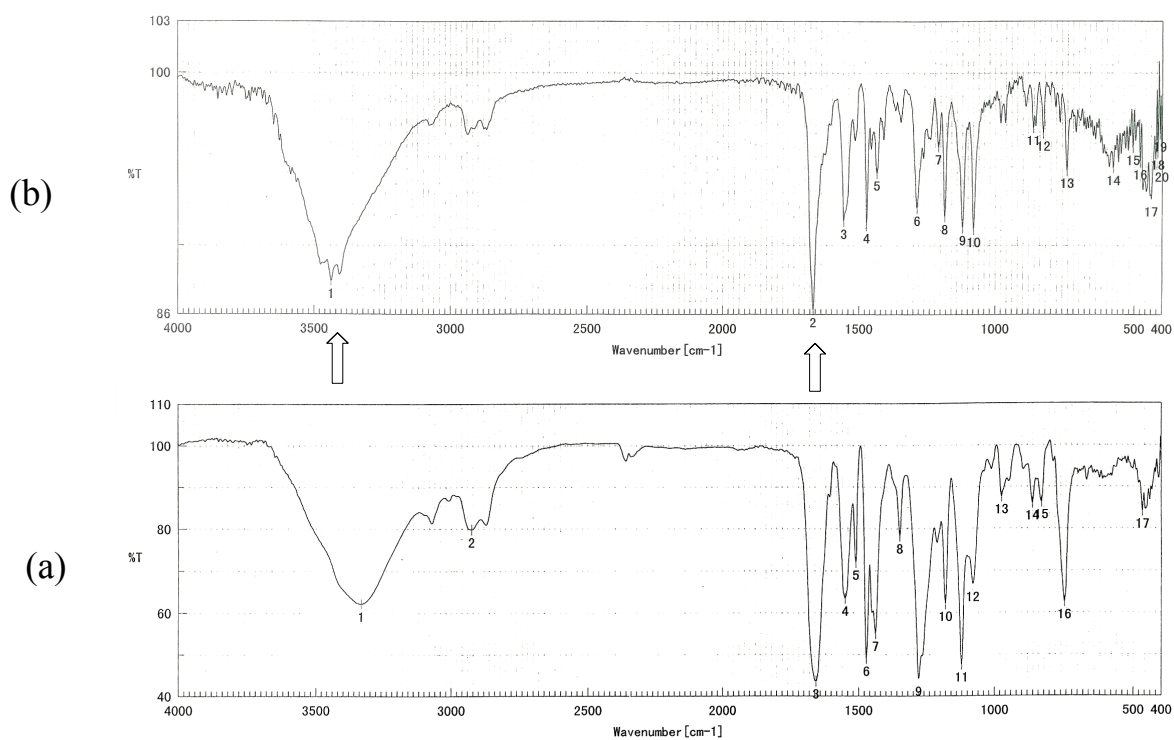

DTA and TGA thermograms of the complex of **4** with carbonic acid

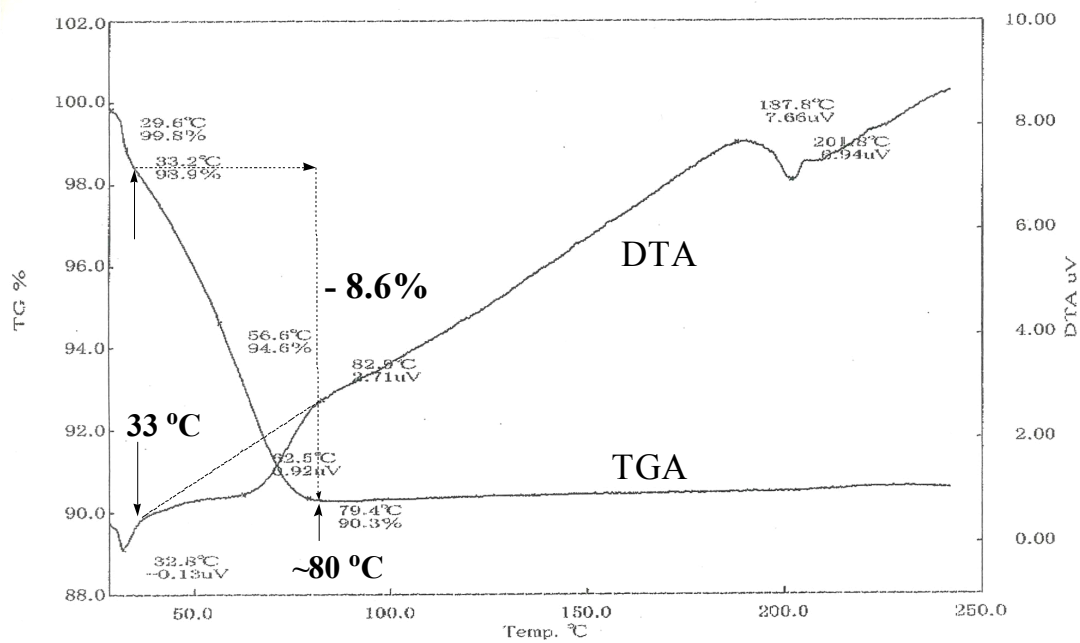

Supplement: b403152k.pdf [file b403152k.pdf]
